# Supplementary material for: Diplazium esculentum (Retz.) Sw. reduces BACE-1 activities and amyloid peptides accumulation in Drosophila models of Alzheimer’s disease
Source: PubMed Central journal article supplement (PMC8664832; doi:10.1038/s41598-021-03142-w), 2021-12-10

# SUPPLEMENTARY DATA

## Supplementary Figure S1:

High performance liquid chromatograms showing retention time ( $R_t$ ) of (A.) 100  $\mu\text{g/mL}$  of rutin (17.201 min), (B.) 10 mg/mL of *D. esculentum* extract, (C.) mixtures of 100  $\mu\text{g/mL}$  of rutin and 10 mg/mL of *D. esculentum* extract at 280 nm.

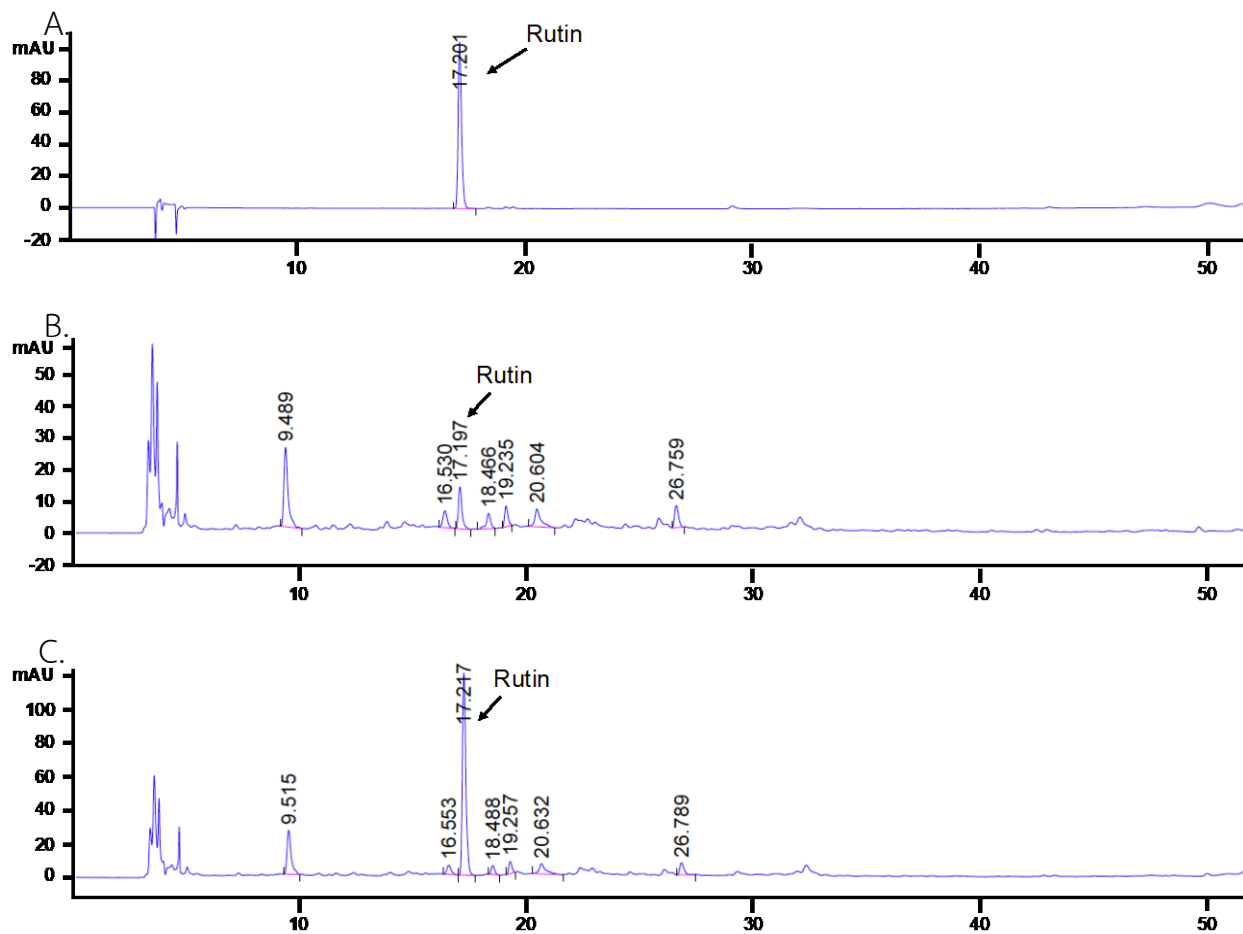

## Supplementary Figure S2:

High performance liquid chromatograms showing retention time ( $R_t$ ) of (A.) 100  $\mu\text{g/mL}$  of quercetin (28.507 min), (B.) 10 mg/mL of acid hydrolyzed *D. esculentum* extract, (C.) mixtures of 100  $\mu\text{g/mL}$  of quercetin and 10 mg/mL of acid hydrolyzed *D. esculentum* extract at 280 nm.

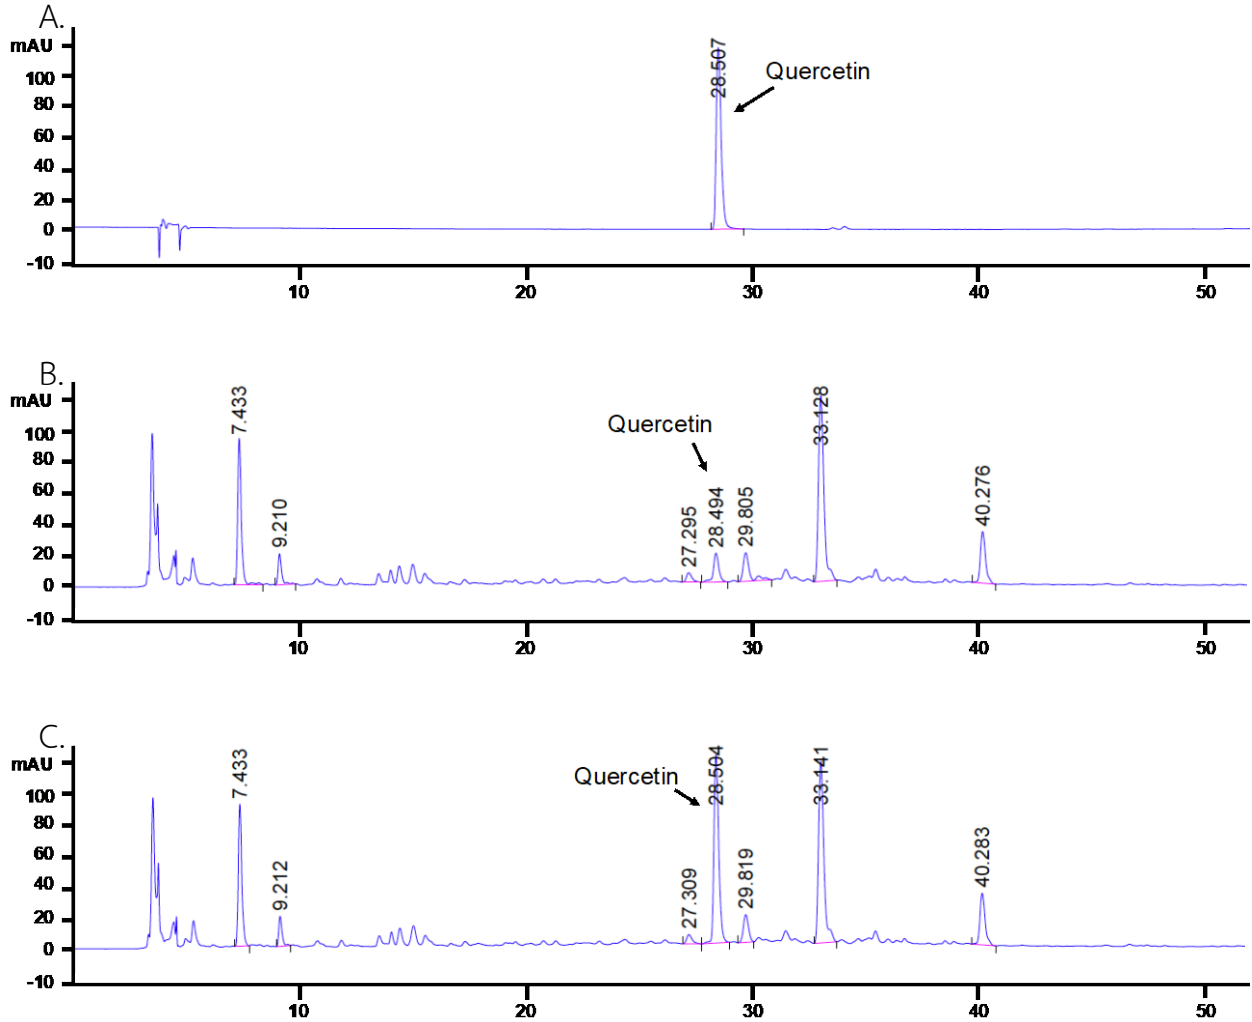

### Supplementary Figure S3:

Schematic diagrams of *Drosophila* crosses and studies. (A.) a schematic diagram of *Drosophila* cross between UAS-APP-BACE-1 and elav-GAL4 to study the effect of *D. esculentum* extract on the human amyloid cascades because the F1 progenies were expressed human APP and BACE-1 in the brain region (B.) a schematic diagram of *Drosophila* cross between UAS-A $\beta$ 42 and elav-GAL4 to study the direct effect of *D. esculentum* extract on A $\beta$ 42 accumulation.

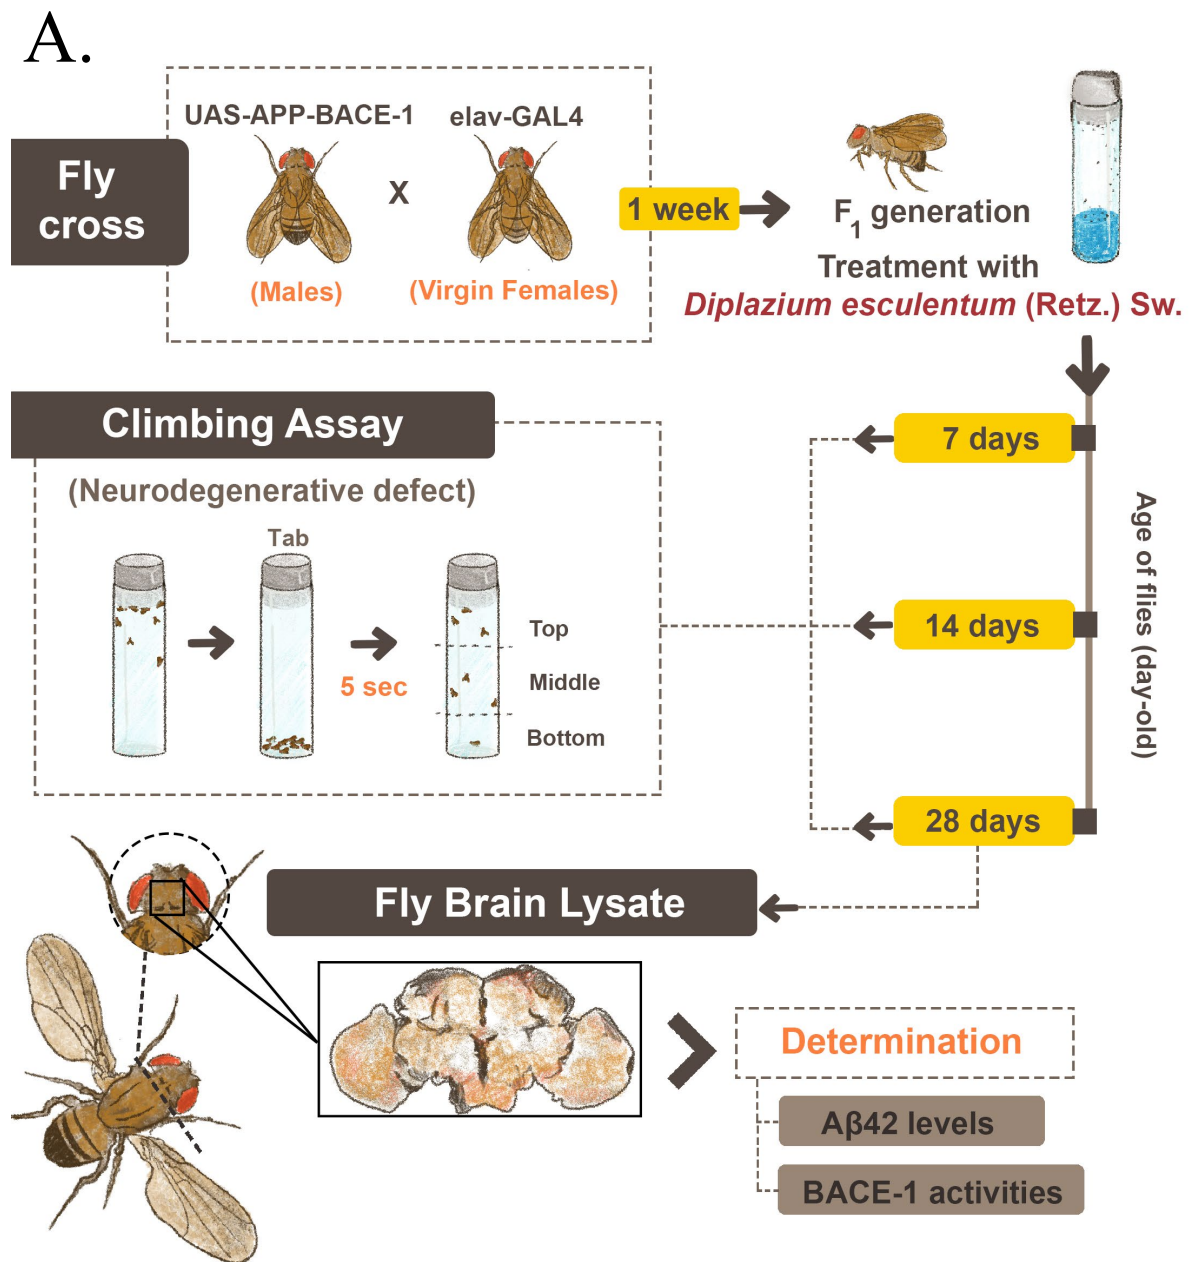

## Supplementary Figure S3 (Cont.):

Schematic diagrams of *Drosophila* crosses and studies. (A.) a schematic diagram of *Drosophila* cross between UAS-APP-BACE-1 and elav-GAL4 to study the effect of *D. esculentum* extract on the human amyloid cascades because the F1 progenies were expressed human APP and BACE-1 in the brain region (B.) a schematic diagram of *Drosophila* cross between UAS-A $\beta$ 42 and elav-GAL4 to study the direct effect of *D. esculentum* extract on A $\beta$ 42 accumulation.

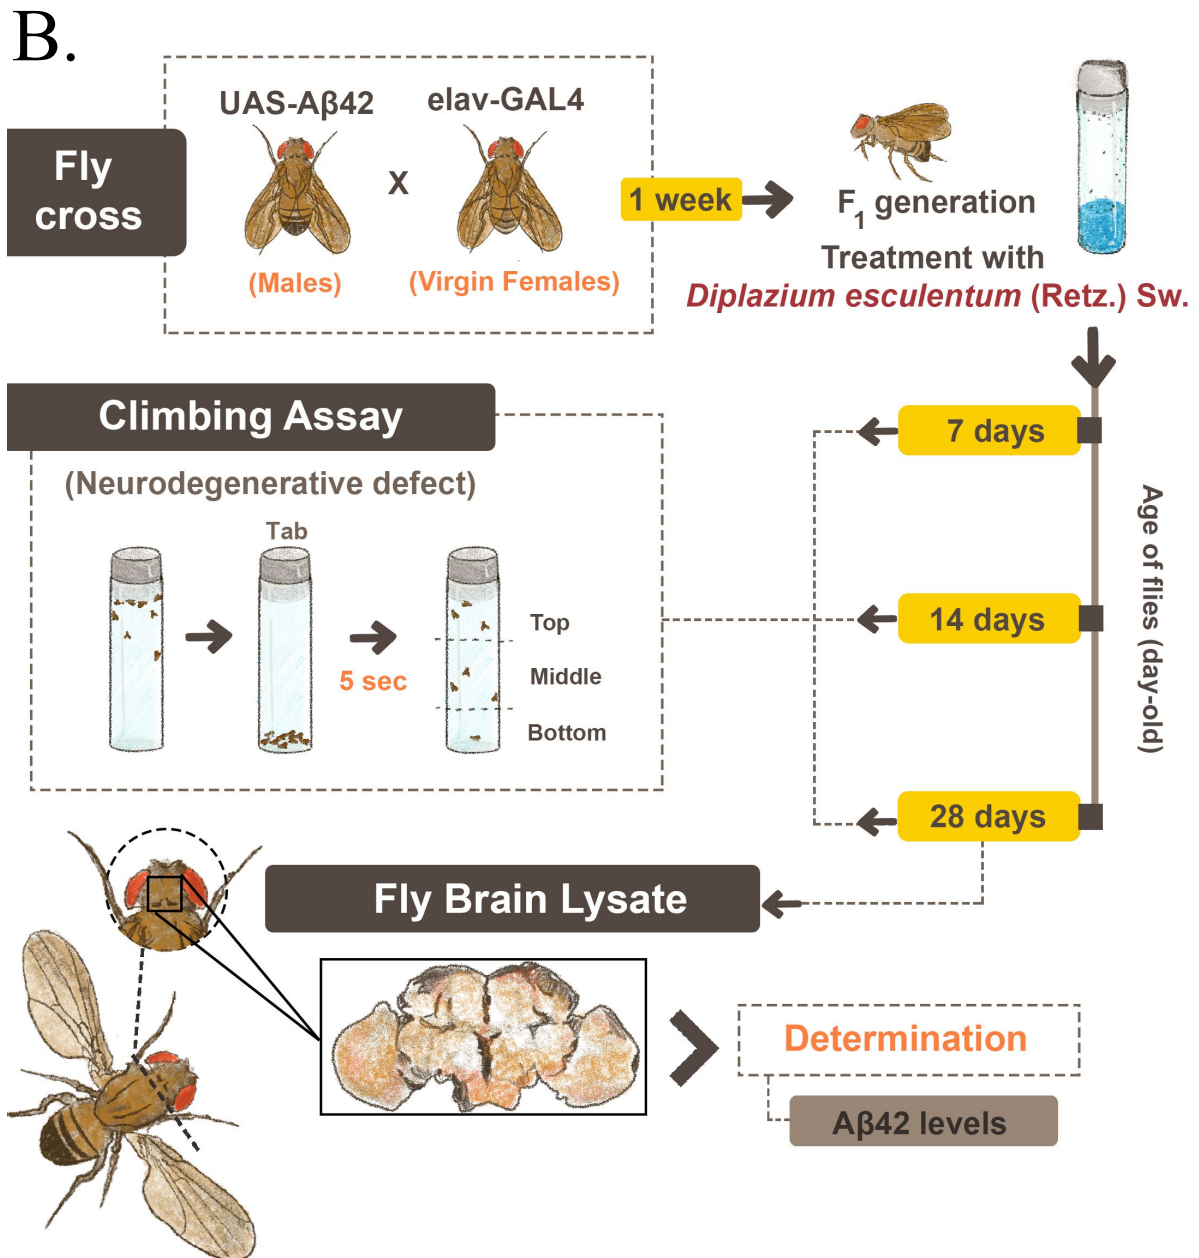

Supplement: 41598_2021_3142_MOESM1_ESM.pdf [file 41598_2021_3142_MOESM1_ESM.pdf]
